1 **Spatial patterns of species richness and nestedness in ant assemblages**  
2 **along an elevational gradient in a Mediterranean mountain range**

3

4 Flores, O.<sup>1,2</sup>; Seoane, J.<sup>2</sup>; Hevia, V.<sup>3</sup>; Azcárate, F.M.<sup>2</sup>

5

6 <sup>1</sup> Corresponding author:

7 Department of Biogeography and Global Change, National Museum of Natural

8 Sciences, Spanish National Research Council (MNCN-CSIC), Spain

9 [omarf@mncn.csic.es](mailto:omarf@mncn.csic.es)

10 Phone: +34 917452500 ext 980805

11 <sup>2</sup> Terrestrial Ecology Group, Department of Ecology, Universidad Autónoma de

12 Madrid, Spain

13 <sup>3</sup> Social-ecological Systems Laboratory, Department of Ecology, Universidad

14 Autónoma de Madrid, Spain

15

16

17

18

19

## 20 **Abstract**

21 The study of biodiversity spatial patterns along ecological gradients can serve to  
22 elucidate factors shaping biological community structure and predict ecosystem  
23 responses to global change. Ant assemblages are particularly interesting as study cases,  
24 because ant species play a key role in many ecosystem processes and have frequently  
25 been identified as useful bioindicators. Here we analyzed the response of ant species  
26 richness and assemblage composition to elevational gradients in Mediterranean  
27 grasslands and subsequently tested whether these responses were stable spatially and  
28 temporally. We sampled ant assemblages in two years (2014, 2015) in two mountain  
29 ranges (Guadarrama, Serrota) in Central Spain, along an elevational gradient ranging  
30 from 685 to 2390 m a.s.l.

31 Jackknife estimates of ant species richness ranged from three to 18.5 species and  
32 exhibited a hump-shaped relationship with elevation that peaked at mid range values  
33 (1100 – 1400 m). This pattern was transferable temporally and spatially. Elevation was  
34 significantly related to ant assemblage composition and facilitated separation of higher  
35 elevation assemblages (> 1700 m) from the remaining lower elevation species groups.  
36 Ant assemblages were nested; therefore species assemblages with a decreased number  
37 of species were a subset of the richer assemblages, although species turnover was more  
38 important than pure nestedness in all surveys. The degree of nestedness changed non-  
39 linearly as a cubic polynomial with elevation. These assembly patterns were observed  
40 over time but not between the two study regions.

41 We concluded double environmental stressors typical of Mediterranean mountains  
42 explained species richness patterns: drought at low elevations and cold temperatures at  
43 high elevations likely constrained richness at both extremes of elevational gradients.

44 The fact that species turnover showed a dominant role over pure nestedness suggested  
45 current ant assemblages were context-dependent (spatio-temporal factors) and highly  
46 vulnerable to global change, which threatens the conservation of present day native ant  
47 communities, particularly at high elevations.

48

## 49 **Introduction**

50 Predicting the response of biodiversity to the main drivers of Global Change has  
51 become a primary goal of modern ecology [1-3]. Consequently, the analysis of species  
52 richness and assembly patterns along latitudinal and altitudinal gradients provide clues  
53 to project possible effects of climate change on communities [4, 5]. The Mediterranean  
54 mountains are particularly suitable for this purpose, given a characteristic combination  
55 of temperature and water availability gradients in space and time, which determines a  
56 progressively cooler and wetter environment at higher elevations while valleys suffer  
57 more severe summer drought conditions [6, 7]. In addition, the Mediterranean Basin  
58 will probable face particularly marked increases in aridity, temperature and frequency of  
59 extreme climatic events [8-10]; therefore it is critical to advance our knowledge of how  
60 basin communities respond to more severe abiotic factors.

61 Ants are diverse and ubiquitous, exhibit strong interspecific interactions, and perform  
62 many functional processes in ecosystems [11]; therefore ants are considered a viable  
63 indicator group of ecosystem change by many community ecologists. Ants are also  
64 dominant terrestrial community members [12] and play an important role in plant  
65 community dynamics, acting as seed harvesters [13], dispersal agents [14], and  
66 influencing soil nutrient status and plant growth [15]. As predators, ants control

67 herbivore abundance, drive relevant top-down effects, and are often used as biological  
68 control agents of insect pests and fungal pathogens [16]. Furthermore, ant distribution  
69 and abundance patterns provide information to address specific environmental  
70 management issues [17, 18]; consequently, ants are particularly useful bioindicators.

71 Previous research on ant diversity documented variable responses to altitudinal  
72 gradients, which showed a certain dependency on macroclimate. For instance, studies  
73 reporting monotonic decreases in species richness, were frequent in temperate  
74 mountains [19-21], while monotonic increases were observed in arid environments [22,  
75 23]. Longino and Colwell [24] and Nowrouzi *et al.* [25] indicated more complex  
76 patterns in tropical climates, which often combined a monotonic decrease at high  
77 elevations with a plateau at low elevations. Mid-elevation peaks were reported in  
78 tropical areas [26, 27], although also frequent at other latitudes [28, 29]. These patterns  
79 were partially attributed to geometric constraints, such as the mid-domain effect and  
80 area availability [30, 31] or the Rapoport rescue effect [32]. However the role of  
81 climatic factors, including temperature [19-21] and water availability [22, 29, 33, 34] as  
82 direct drivers of ant diversity is also unequivocal. Moreover, several studies  
83 demonstrated these climatic variables also indirectly modulated ant diversity, for  
84 example, by affecting primary productivity [33, 35-37].

85 Understanding how ant diversity responds to altitudinal gradients is not sufficient,  
86 however, to predict how environmental changes (e.g. rising temperatures) will affect  
87 species geographic ranges, because knowledge on species composition patterns is also  
88 required. Species assemblages and their distributions along ecological and geographical  
89 gradients result from species tolerances to climatic (abiotic) factors and biotic  
90 interactions, which interplay with niche evolution to determine community composition

91 [38-40]. Kodric-Brown and Brown [41] defined a structured community as one where  
92 the organization is not due to randomness [41], and all situations in which communities  
93 are not random can be explained by spatial turnover, nestedness, or combinations of  
94 both [42]. Nestedness of species assemblages occurs when site biotas with smaller  
95 species numbers are subsets of the biotas at richer sites [43, 44]. If environmental and  
96 habitat filtering and not interspecific competition is responsible for nestedness, most  
97 species can coexist. Therefore, under increasing temperatures, species could migrate or  
98 expand their distribution elsewhere from the species former range, without necessarily  
99 implying other resident species will be displaced by the newcomers. On the contrary,  
100 spatial turnover implies the replacement of some species by others, exhibiting gains and  
101 losses of species from location to location globally [45]. This is a sign that some species  
102 cannot coexist, because of different climatic requirements, competitive exclusion, or  
103 both. In general, global warming will extend insect species ranges to higher altitudes  
104 [46], therefore with spatial turnover patterns, species will migrate up an altitudinal  
105 gradient and those at higher altitudes might suffer a subsequent reduction in geographic  
106 distribution range, and even disappear from the area. However, Maguire *et al.* [47]  
107 acknowledged both processes and community patterns might vary with scale, and  
108 exhibit spatio-temporal variation, which raises concerns on our capacity to generalize  
109 the results based on local studies. Indeed, transferability of results is increasingly  
110 considered in analyzing the effects of global change on species distributions, although  
111 such efforts are rarer in studies of community patterns [48-50].

112 In the present study, we explored patterns of ant species diversity and community  
113 composition in Mediterranean mountain grasslands, integrating spatio-temporal  
114 transferability. Specifically, we addressed the following questions: (1) what is the

115 relationship between ant species richness and elevation; (2) how does elevation affect  
116 ant species composition; (3) what are the relative contributions of spatial turnover and  
117 nestedness in ant community composition; and (4) are our findings transferable spatially  
118 and temporally?

119

## 120 **Methods**

### 121 Study areas and sampling design

122 We studied grassland ant communities in two mountains in the larger Sistema Central  
123 range, Sierra de Guadarrama (reaching 2428 m a.s.l. at its highest peak) and Serrota  
124 (maximum 2294 m a.s.l.). The two mountains are ~ 100 km apart with similar climatic,  
125 geologic, and biotic characteristics. Mean annual temperatures range from ~ 14 °C at  
126 600 m to ~ 4 °C at the summits (2300 – 2428 m); and mean annual rainfall ranges from  
127 550 mm to 1500 mm, with severe summer drought [51]. Substrata are primarily  
128 composed of granites, and pasturelands are distributed along the complete elevational  
129 gradient, largely as the result of traditional livestock grazing.

130 Sample sites were interspersed along the elevational gradient, facing southeast to  
131 southwest with gentle slopes (< 5%), and not affected by anthropogenic disturbance  
132 (i.e., not close to buildings or main paths). We sampled 18 grasslands in 2014 (in  
133 Guadarrama range) and 12 in 2015 (six in Guadarrama range and six in Serrota range).  
134 On each grassland, we randomly placed a 4 x 3 grid of pitfall traps, 2.5 cm diameter x 5  
135 cm deep, with 5 m spacing between traps, which were filled with a 3:1 ethanol/  
136 monoethylene glycol mixture. Ant sampling was conducted in July, during stable  
137 anticyclonic meteorological periods (Guadarrama: 17 - 23 July 2014 and 9 - 16 July

138 2015; Serrota: 1 - 8 July 2015), taking advantage of the seasonal ant activity peak  
139 during summer in Central Spain [52]. Traps were collected after one week and ant  
140 specimens were sorted to species, excluding winged ones.

141 Pitfall trapping is considered more objective and unbiased than other methods for  
142 sampling ground ants [53, 11]. We chose pitfall traps previously tested in other studies  
143 in Central Spain, which demonstrated success at capturing the complete species pool  
144 and the entire ant size range variability present in the sampled area [52, 54, 55].

145

#### 146 Statistical analyses

147 We examined the relationship between species richness, taxonomic composition, and  
148 nestedness of grassland ant communities with elevation. Our analytical strategy was to  
149 build descriptive models for the data gathered during the most intensive sampling in  
150 Guadarrama 2014, and to validate the patterns detected with data gathered in a subset of  
151 the Guadarrama grasslands during 2015 (temporal validation) and with data gathered in  
152 the Serrota range during 2015 (spatial validation).

#### 153 *Species richness*

154 First, we assessed the relationship between species richness and elevation. We estimated  
155 the species pool size at each locality with the incidence-based first order jackknife  
156 estimator. The relationship shape between estimates of richness and elevation was  
157 explored applying a generalized additive model (GAM) with Gaussian errors and a thin  
158 plate regression spline for elevation. Models were built with data from Guadarrama  
159 2014 sampling and validated with data from the Guadarrama 2015 and Serrota 2015  
160 samplings. Squared Pearson correlation between jackknife estimates of richness and

161 jackknife estimates predicted by the model were used to assess species richness pattern  
162 constancy between years and sites.

163 *Taxonomic composition of assemblages*

164 We explored how species assemblages differed based on taxonomic composition by  
165 applying non-metric multidimensional scaling (NMDS) to the hemi-matrices of binary  
166 Bray-Curtis distances among grasslands derived from species occurrences in pitfall  
167 traps. In addition, a model-based analysis was conducted by building separate negative  
168 binomial regressions for each species abundance data (as the multivariate response  
169 variable) by elevation, year, and interaction (as the explanatory variables) [56].  
170 Significance of the interaction (assessed by resampling) would suggest that patterns of  
171 species composition along an elevational gradient changed between years. Likewise, for  
172 Guadarrama 2014 and Serrota 2015, a multivariate model was built by fitting negative  
173 binomial regressions for individual species abundance, elevation, location, and  
174 interaction [56]. Significance of the interaction would suggest how assemblages  
175 changed with elevation were context-dependent.

176 *Nestedness patterns*

177 To assess assemblage nestedness among grasslands surveyed on each mountain and  
178 year we calculated the matrix temperature (T) [57] and the NODF (Nestedness metric  
179 based on Overlap and Decreasing Fill) [58]. While T has traditionally been the most  
180 commonly used metric for assessing overall nestedness [59], the more recent NODF  
181 index is claimed to exhibit more robust statistical properties, and separate contributions  
182 to nestedness of columns (due to species incidence) and rows (due to site composition)  
183 can be quantified [58, 60]. T decreases and NODF increases with nestedness.



184

185 The significance of nestedness indices was estimated by comparison with suitable  
186 binary null models, which were simulated by randomizing the original matrix  
187 transformed to presence/absence binary data. Two null models were built to encompass  
188 the range from maximally liberal (equitable) to maximally conservative (constrained)  
189 null models [61]. The first was an equiprobable model built by randomizing rows and  
190 columns and therefore maintaining only the number of species presences ('r00'  
191 algorithm). The second was a proportional resampling model constructed by  
192 constraining randomization to maintain row and column totals (site richness and species  
193 incidence, respectively), while using marginal column frequency to select species  
194 ('quasiswap' algorithm). Thus, the first null model was more liberal and only accounted  
195 for matrix fill (the incidence of the total species set), while the second null model was  
196 more stringent, because it imposed additional structure on the data, accounting for  
197 among-site differences (e.g. different carrying capacities) and among-species  
198 differences (e.g. different rarities). Subsequently, significant nestedness was attributed  
199 to variation in observed species richness or species incidence, if evaluated with the  
200 equiprobable model, or to variation beyond that observed, if evaluated with the  
201 proportional resampling model [62]. One thousand randomizations of the original  
202 matrix were applied.

203 The relative degree of nestedness, i.e. how much a grassland was nested within the set  
204 of sampled grasslands in the same geographic area and time period, was evaluated by a  
205 nestedness rank, according to T. Poorer grasslands, i.e. those having lower species  
206 diversity which were a subset of richer grasslands, were assigned higher ranks. These  
207 ranks were estimated as the ordinate in nestedness plots built with the T index, which

208 were calculated as  $(k - 0.5)/n$  for  $k = 1 \dots, n$  rows (e.g. the bottom row in the graph,  
209 where  $k = 18$  was the more nested site, which for the 2014 sampling in Guadarrama had  
210 a rank of  $(18 - 0.5)/18 = 0.97$ ).

211 The shape of the relationship between nestedness and elevation during the 2014  
212 sampling in Guadarrama ( $n = 18$ ) was explored using GAM with Gaussian errors and a  
213 thin plate regression spline for elevation. This model was validated using Guadarrama  
214 2015 data (temporal validation). Detection of a high correlation between observed (in  
215 2015) and predicted ranks would suggest the nestedness rank of plots did not vary  
216 between years. Similarly, the model built with Guadarrama 2014 sampling data was  
217 validated using the Serrota 2015 data (spatial validation). Detection of a high correlation  
218 between observed and predicted ranks would suggest the nestedness rank of plots did  
219 not vary between regions.

220 The contributions of spatial turnover and nestedness to the distribution pattern in  
221 Guadarrama 2014 data were calculated using three beta diversity indices: Sørensen-  
222 based multiple-site dissimilarity ( $\beta_{\text{SOR}}$ ), Simpson-based multiple-site dissimilarity  
223 ( $\beta_{\text{SIM}}$ ), and nestedness-resultant multiple-site dissimilarity ( $\beta_{\text{NES}}$ ).  $\beta_{\text{SIM}}$  accounts for  
224 spatial turnover and  $\beta_{\text{NES}}$  integrates dissimilarity due to nestedness, while  $\beta_{\text{SOR}}$   
225 expresses the total dissimilarity between communities and equals the sum of  $\beta_{\text{SIM}}$  and  
226  $\beta_{\text{NES}}$  [42]. *P*-values were estimated through the equiprobable ('r00') null model (the  
227 proportional resampling null model was not useful to assess this partitioning of beta  
228 diversity).

229 Statistical analyses were performed using R (v 3.3.2; R Core Team 2016) and  
230 specialized packages *vegan* (v. 2.4-5) [63], *mvabund* (v. 3.12-3) [56], and *betapart*  
231 (1.5.0) [64].

232

## 233 **Results**

234 We detected 37 species, all recorded in Guadarrama (35 in 2014 and 26 in 2015, 24  
235 were shared between years) and 20 species in Serrota (all species shared with  
236 Guadarrama). A total of 15 species were common among the three surveys (**S1 Table**).

237 Jackknife estimates of ant species richness in Guadarrama 2014 ranged from three (SE  
238 = 0) species in most of the highest grasslands to 18.5 (SE = 2.6) at intermediate  
239 elevations (**Table 1**). Estimates of richness related to elevation were positive below  
240 1100 m a.s.l. and negative until a lower limit was reached at ca. 2000 m a.s.l. (**Fig 1**).

241 Overall, richness exhibited a hump-shaped relationship with elevation, which we  
242 described using GAM with a spline for elevation, roughly equivalent to a third-order  
243 degree polynomial (equivalent  $df = 3.96$ ,  $F = 12.94$ ,  $P < 0.0001$ ,  $D^2 = 83.8\%$ , **Fig 1**).  
244 This pattern of species richness was similar between years and between mountain  
245 ranges (correlations for estimates of richness and richness predicted by the model were  $r$   
246 = 0.92,  $t = 4.68$ ,  $df = 4$ ,  $P = 0.0095$ ,  $R^2 = 85\%$  for Guadarrama 2015 data; and  $r = 0.86$ ,  $t$   
247 = 3.42,  $df = 4$ ,  $P = 0.0267$ ,  $R^2 = 75\%$  for Serrota 2015 data).

248 **Table 1. Observed (S) and first-order jackknife estimator ( $J \pm SE$ ) of ant species**  
249 **richness in dry grasslands in central Spain.**

| ID | Sampling | S | $J \pm SE$    | N  | X      | Y       | Elevation (m) |
|----|----------|---|---------------|----|--------|---------|---------------|
| G1 | G2014    | 7 | $7 \pm 0$     | 13 | 437876 | 4494480 | 685           |
| G1 | G2015    | 7 | $7.9 \pm 0.9$ | 10 | 437876 | 4494480 | 685           |

|     |       |    |          |    |        |         |      |
|-----|-------|----|----------|----|--------|---------|------|
| G2  | G2014 | 8  | 8±0      | 12 | 434821 | 4496549 | 768  |
| S1  | S2015 | 14 | 18.5±2.4 | 10 | 351711 | 4474792 | 808  |
| G3  | G2014 | 14 | 16.7±1.6 | 11 | 440394 | 4503515 | 865  |
| G4  | G2014 | 14 | 16.8±1.6 | 12 | 435541 | 4506094 | 1012 |
| G5  | G2014 | 14 | 15.8±1.3 | 12 | 431692 | 4513777 | 1044 |
| G5  | G2015 | 11 | 11.9±0.9 | 12 | 431692 | 4513777 | 1044 |
| S2  | S2015 | 11 | 14.7±2.3 | 12 | 357653 | 4481333 | 1086 |
| G6  | G2014 | 13 | 14.8±1.3 | 9  | 414145 | 4507982 | 1171 |
| G7  | G2014 | 13 | 18.5±2.6 | 12 | 438808 | 4523233 | 1285 |
| G8  | G2014 | 15 | 15.9±0.9 | 11 | 416330 | 4511347 | 1330 |
| G8  | G2015 | 14 | 17.5±2.2 | 8  | 416330 | 4511347 | 1330 |
| S3  | S2015 | 13 | 15.8±1.6 | 12 | 340207 | 4476196 | 1374 |
| G9  | G2014 | 9  | 9±0      | 12 | 436806 | 4524537 | 1487 |
| G10 | G2014 | 10 | 12.8±1.6 | 12 | 400821 | 4495703 | 1625 |
| S4  | S2015 | 4  | 4±0      | 11 | 326465 | 4482790 | 1646 |
| G11 | G2014 | 3  | 3±0      | 19 | 400543 | 4496999 | 1675 |
| G12 | G2014 | 5  | 5.9±0.9  | 12 | 419833 | 4519838 | 1786 |
| G12 | G2015 | 5  | 5.9±0.9  | 12 | 419833 | 4519838 | 1786 |

|     |       |   |         |    |        |         |      |
|-----|-------|---|---------|----|--------|---------|------|
| G13 | G2014 | 5 | 5±0     | 12 | 419076 | 4519012 | 1830 |
| G14 | G2014 | 4 | 4.9±0.9 | 12 | 418737 | 4519177 | 1920 |
| S5  | S2015 | 2 | 2±0     | 12 | 323719 | 4482788 | 2000 |
| G15 | G2014 | 3 | 3±0     | 12 | 419392 | 4520829 | 2026 |
| G15 | G2015 | 3 | 3±0     | 8  | 419392 | 4520829 | 2026 |
| G16 | G2014 | 3 | 3.9±0.9 | 12 | 417883 | 4521249 | 2139 |
| G17 | G2014 | 4 | 5.8±1.9 | 12 | 418676 | 4521128 | 2266 |
| S6  | S2015 | 3 | 3.9±0.9 | 12 | 323944 | 4485467 | 2286 |
| G18 | G2014 | 3 | 3±0     | 12 | 419420 | 4522544 | 2390 |
| G18 | G2015 | 3 | 3.9±0.9 | 12 | 419420 | 4522544 | 2390 |

250 Grassland plots were ordered following elevation (in m a.s.l.), identified with an ID,  
 251 where G stands for Guadarrama, S stands for Serrota, and numbers represent grassland  
 252 position in increasing order of elevation. Sampling: data from Guadarrama range in  
 253 2014 (G2014) and 2015 (G2015) and Serrota range in 2015 (S2015). N: samples sizes  
 254 (number of pitfall traps recovered from each locality). Geographic coordinates (X and  
 255 Y) were provided as UTM European Datum 1950.

256 **Fig 1. Relationship between first-order jackknife estimates of ant species richness**  
 257 **(see Table 1) and elevation in dry grasslands of a Mediterranean range in central**  
 258 **Spain.**

259 Curve and 95% IC from GAM with Gaussian errors fit to the Guadarrama 2014 survey  
260 (black circles). Richness estimates for the surveys in Guadarrama 2015 (grey circles)  
261 and Serrota 2015 (open circles) were superimposed. Elevation values were slightly  
262 jittered to avoid overlap among some points.

263

264 A NMDS solution was built that satisfactorily summarized the Bray-Curtis distances  
265 among grasslands in both years and study regions (stress = 0.10, linear  $R^2$  between  
266 Bray-Curtis and NMDS distances = 0.95). This scaling separated grasslands roughly  
267 according to elevation, but not regions or years and suggested an elevation threshold of  
268 1700 m a.s.l. was a suitable elevation to distinguish the two groups (**Fig 2**). Multivariate  
269 GLMs for species abundances revealed significant elevation effects ( $P = 0.001$ ) and a  
270 significant region effect ( $P = 0.047$ ), but significant effects were not detected for year or  
271 any elevation interactions (**Table 2**). These results suggested taxonomic composition  
272 varied mainly with elevation, but differences between regions cannot be excluded.

273

274 **Fig 2. Non-metric multidimensional scaling (NMDS) of ant assemblages based on**  
275 **binary Bray-Curtis distances among grasslands calculated with species**  
276 **occurrences from pitfall traps in a Mediterranean range of central Spain.**

277 Circles represent data from Guadarrama (black: year 2014, grey: year 2015) and Serrota  
278 (open circles) ranges. Symbol sizes are proportional to the elevation of sampling plots.  
279 As reference, circles are superimposed to a smooth elevation surface (estimated using a  
280 GAM of elevation on a bivariate spline of NMDS scores). The positions of some  
281 illustrative species are given as reference.

282

283 **Table 2. Multivariate GLMs (negative binomial regressions) fitted to species abundances.**

|                    | Deviance | P values     |
|--------------------|----------|--------------|
| a)                 |          |              |
| Elevation          | 192.91   | <b>0.001</b> |
| Year               | 50.27    | 0.649        |
| Elevation x Year   | 5.99     | 0.997        |
|                    |          |              |
| b)                 |          |              |
| Elevation          | 178.14   | <b>0.001</b> |
| Region             | 84.44    | <b>0.047</b> |
| Elevation x Region | 18.85    | 0.618        |
|                    |          |              |

284 *P*-values estimated by bootstrap (n = 1000). Significant *P*-values ( $P < 0.05$ ) are highlighted in

285 bold. a) Guadarrama 2014 vs. Guadarrama 2015. b) Guadarrama 2014 vs. Serrota 2015.

286

287 Ant species assemblages were nested, showing a pattern suggesting differences in

288 species richness among localities were more important than differences in prevalence

289 among species (nestedness among rows was higher than nestedness among columns,

290 **Table 3, S2 Table**). Nestedness ranks for Guadarrama 2014 was described with GAM

291 and curvilinear term (spline) for elevation, roughly similar to a third-degree cubic  
 292 polynomial ( $df = 3.89$ ,  $F = 15.38$ ,  $P < 0.0001$ ,  $D^2 = 85.6\%$ , **Fig 3**). The subset of these  
 293 grasslands sampled in 2015 maintained their nestedness ranks and the model transferred  
 294 to 2015 data (Pearson's correlation between predicted and observed ranks,  $r = 0.96$ ,  $t =$   
 295  $7.28$ ,  $df = 4$ ,  $P = 0.0018$ ,  $R^2 = 93\%$ , **S3 Fig**). The model did not transfer between study  
 296 regions ( $r = 0.74$ ,  $t = 2.18$ ,  $df = 4$ ,  $P = 0.10$ ,  $R^2 = 54\%$ , **S4 Fig**). Largely, nestedness  
 297 increased with elevation, with the exception of the lowest and highest elevation  
 298 grasslands.

299 **Table 3. Nestedness indices for dry grassland ant assemblages in Guadarrama**  
 300 **range 2014 surveys (18 grasslands, 35 species).**

| NODF                         | NODFr                        | NODFc                        | T                            | fill |
|------------------------------|------------------------------|------------------------------|------------------------------|------|
| 38.31:<br><b>0.001-0.015</b> | 40.62:<br><b>0.001-0.001</b> | 37.72:<br><b>0.001-0.103</b> | 25.24:<br><b>0.001-0.912</b> | 0.23 |

301

302 Indices were derived from the Nestedness metric based on Overlap and Decreasing Fill  
 303 (NODF), NODFr for rows (i.e. localities) and NODFc for columns (i.e. species) and  
 304 matrix temperature (T). Numbers under headings for indices provide the index values  
 305 followed by  $P$ -values estimated by equiprobable ('r00') and proportional resampling  
 306 ('quasiswap') binary null models. Significant  $P$ -values ( $P < 0.05$ ) are in bold face. Fill:  
 307 matrix fill (sum of 1s/sum of cells).

308



309 **Fig 3. Generalized additive model (GAM) of nestedness ranks (based on nestedness**  
310 **temperature (T) index) for elevation in ant species assemblages in dry grasslands**  
311 **of a Mediterranean range in central Spain.**

312 Curve and 95% IC from GAM with Gaussian errors fit to the Guadarrama 2014 survey  
313 (black circles). Nestedness ranks for the Guadarrama 2015 (grey circles) and Serrota  
314 2015 (open circles) surveys are superimposed. Low ranks indicate poorer species  
315 community richness, where species are a subset of richer species communities.  
316 Elevation values were slightly jittered to avoid overlap among some points.

317

318 Species turnover and nestedness were significant beta diversity components, although  
319 species turnover among grasslands was more important than pure nestedness of  
320 assemblages ( $\beta_{\text{SOR}} = 0.88$ ,  $\beta_{\text{SIM}} = 0.79$ ,  $\beta_{\text{NES}} = 0.09$ , all  $P$ -values = 0.001). This  
321 relationship among beta diversity components did not vary among surveys (**S5 Table**).

322

323 **Discussion**

324 Ant species richness and taxonomic composition changed predictably with elevation in  
325 the Mediterranean mountains we investigated, exhibiting largely consistent patterns  
326 between years and among regions. These changes were more notable along mid-  
327 elevations and associated more clearly with differences of species richness among sites  
328 than with prevalence or abundance among species. To our knowledge, this is the first  
329 study specifically designed to describe ant community species richness and taxonomic  
330 composition responses to elevational changes in the Mediterranean Basin. However, we  
331 restricted our study to grasslands, therefore the results might not be a suitable model

332 system for other habitat types. Notwithstanding, grasslands are among the ecosystems  
333 exhibiting greater economic and ecological relevance in the Mediterranean Basin [65,  
334 66].

335 Species richness showed a hump-shaped relationship with elevation, peaking at ca. 1100  
336 m a.s.l. This model depiction fit to the primary dataset (Guadarrama 2014), transferred  
337 adequately to the 2015 Guadarrama dataset, and also the spatial validation dataset in the  
338 2015 Serrota range. Despite geometric constraints as mid-domain effects were described  
339 to explain these curve types [30], more recent studies tended to downplay the  
340 importance of these mechanisms [24, 29, 67]. In fact, while mid elevation peaks in  
341 species diversity were reported as relatively common [28, 29], these observations are far  
342 from universal, suggesting regional factors play an important role in driving elevational  
343 patterns of species diversity. Interestingly, research showed monotonic increases in ant  
344 species richness were common in temperate climates [19-21], where elevation was  
345 correlated with temperature. In arid climates, monotonic decreases were observed [22,  
346 23], where hydric stress was ameliorated with altitude. Indeed, hydric stress and  
347 temperature are the two main elevational correlates in Mediterranean climates, with  
348 water availability limiting communities at low elevations, while at high elevations cold  
349 temperature stress is more important [6, 7]. This double constraint might drive a hump-  
350 shaped spatial pattern of ant species richness in Mediterranean mountains.

351 Most studies on ant communities reported species richness positively responded to  
352 temperature [19-21, 24, 26, 27, 67, 68], but a number of findings also emphasized the  
353 role of water availability [22, 29, 33, 34, 69]. Cold temperatures can reduce local ant  
354 species richness by direct effects that limit ant activity, such as reduced foraging time  
355 [35, 70], and, at larger biogeographical scales, cold temperatures can also limit species

356 pools by lowering speciation rates [67]. Azcárate *et al.* [70] reported low humidity, in  
357 turn, can limit colony activation by reducing foraging possibilities, and therefore  
358 constitutes a main environmental filter. Alternatively, temperature and water availability  
359 can facilitate ant species richness indirectly, these abiotic factors affecting primary  
360 productivity and therefore the range and abundance of resources ant colonies exploit  
361 [33, 35-37]. Diversity-productivity hypothesis states that as productivity increases, so  
362 does the availability of energy and resources, so density and size of colonies also  
363 increase. These relationships should increase local species richness by abundance,  
364 lowering local extinction risks or activating a sampling mechanism [71, 72]. In  
365 Mediterranean climates, primary productivity can be limited by cold temperatures and  
366 summer drought [73], so maximum primary productivity values likely occur at  
367 intermediate elevations, where summer drought is not too severe and temperatures are  
368 not too cold. Therefore, if species richness increases with primary productivity, a  
369 humped curve is also expected.

370 As anticipated, elevation also affected the taxonomic composition of ant communities.  
371 We observed a ca. 1700 m threshold separating high mountain ant species communities  
372 from those along the lower elevational gradient. This threshold was consistent among  
373 regions and between years. Furthermore, although nestedness was a significant  
374 component of beta diversity, most elevational shifts among communities were  
375 attributable to species turnover. This result suggested the communities with lowest ant  
376 species diversity (high mountain communities) were also the most unique in a regional  
377 context. The singularity of high elevation ant communities was previously observed in  
378 different biomes [22, 24, 34, 35], which reinforced the conservation value of the  
379 Mediterranean mountains reported for other taxa [74, 75].

380 The examination of community nestedness suggested current ant assemblages are  
381 context-dependent and likely highly vulnerable to global warming and other  
382 anthropogenic changes. This is because, first, species turnover exhibited a dominant  
383 role over pure nestedness, which indicated different and characteristic groups of ant  
384 species occurred along an elevational gradient, and at the very least, ant species  
385 community composition was distinct at high elevations (> 1700 m) (**Fig 2**). We want to  
386 emphasize that if species distributions followed gradually changing abiotic conditions  
387 (e.g. a decreasing temperature gradient with elevation), then we would expect a  
388 concomitant change in the taxonomic composition of ant assemblages, rather than the  
389 development of new, characteristic, species groups [42, 76]. It is also illuminating to  
390 consider that nestedness arises with contributions from differences among species and  
391 among sites [59]. Nestedness patterns elsewhere were explained as a simple sampling  
392 mechanism, where the smaller species group in less diverse, i.e. poorer communities  
393 were a subset of species in more diverse, i.e. richer communities, reportedly when the  
394 studied localities differed in resource availability (or productivity) and this factor  
395 determined species richness [72, 77]. However, this implied species attributes notably  
396 contributed to nestedness, because rarer species with small distributional ranges (often  
397 specialists or poor-dispersers) were not generally sampled by the least diverse, i.e.  
398 poorest communities, while the more common taxa exhibited a wide distributional  
399 range [61]. In our study, the least diverse communities were more nested than diverse  
400 ant communities, but nestedness among species was less important than among sites.  
401 We conclude the sampling mechanism did not fully explain the nested patterns in the  
402 ant communities we identified and habitat and abiotic filtering provided more plausible  
403 explanations for the patterns. However, we carefully controlled by design the habitat  
404 type (arid grasslands in gentle south facing slopes), which implied those habitat filters —

405 if an integral component — should be fine grained. Nestedness patterns along the  
406 elevational gradient were temporally constant, but varied between mountain ranges,  
407 indicating ant community composition was spatially dependent. Finally, an historic  
408 explanation of current ant species distribution patterns in a landscape context is an  
409 important element to include. We studied a mountain range within the Mediterranean  
410 biome where major landscape changes have not occurred over the last thirty years.  
411 Extensive afforestation was conducted during 1950's and a progressive abandonment of  
412 the region took place between the 1960's and 1980's. Therefore, we assume all sites are  
413 equally accessible from the regional species pool. However, we cannot disregard other  
414 time-related mechanisms, which might explain community composition, such as priority  
415 effects favoring one or more species, depending on their relative order of arrival to a site  
416 [78], or metapopulation dynamics involving local extinctions and recolonizations in  
417 periods beyond this two-year study [79].

418 Overall, species taxonomic composition varied non-linearly with elevation. The  
419 insufficiency of the sampling mechanism emphasizes that ant assemblages are highly  
420 vulnerable to global changes on climate and anthropogenic impacts, which might affect  
421 species at the habitat and/or community level. It is unlikely species' range shifts that  
422 track environmental change will maintain current ant species community composition.

423

#### 424 **Acknowledgements**

425 This study could not have been carried out without the enthusiastic support of students  
426 at Department of Ecology UAM (Cristina Rota, Víctor Pascual, Jesús Miranda, Celia  
427 Santos, Rubén Altozano, Inés Cueva) and friends (Montse Reina, Esperanza Iranzo,

428 Aimara Planillo, Carlos Pérez Carmona, Xavier Espadaler) who helped with field and  
429 laboratory work. The study received partial support by the Madrid's Government  
430 research group network REMEDINAL3-CM (S-2013/MAE-2719) and is a contribution  
431 to project CGL2014-53789-R.

432

### 433 **References**

434 [1] Gilman SE, Urban MC, Tewksbury J, Gilchrist GW, Holt RD. A framework for  
435 community interactions under climate change. *Trends in Ecology & Evolution*.  
436 2010;25(6):325-331.

437 [2] Bellard C, Bertelsmeier C, Leadley P, Thuiller W, Courchamp F. Impacts of  
438 climate change on the future of biodiversity. *Ecology Letters*. 2012;15(4):365-377.

439 [3] Oliver TH, Morecroft MD. Interactions between climate change and land use  
440 change on biodiversity: attribution problems, risks, and opportunities. *Wiley*  
441 *Interdisciplinary Reviews: Climate Change*. 2014;5(3):317-335.

442 [4] Wilson RJ, Gutiérrez D, Gutiérrez J, Montserrat VJ. An elevational shift in  
443 butterfly species richness and composition accompanying recent climate change. *Global*  
444 *Change Biology*. 2007;13:1873-1887.

445 [5] Devictor V, Julliard R, Couvet D, Jiguet F. Birds are tracking climate warming, but  
446 not fast enough. *Proceedings of the Royal Society B: Biological Sciences*.  
447 2008;275:2743-2748.

448 [6] Walter H, Breckle SW. *Walter's vegetation of the earth: the ecological systems of*  
449 *the geo-biosphere*. 4th ed. Berlin. Springer; 2002.

450 [7] Schöb C, Armas C, Guler M, Prieto I, Pugnaire FI. Variability in functional traits  
451 mediates plant interactions along stress gradients. *Journal of Ecology*. 2013;101(3):753-  
452 762.

453 [8] Nogués-Bravo D, Araújo MB, Lasanta T, Moreno JIL. Climate change in  
454 Mediterranean mountains during the 21st century. *AMBIO: A Journal of the Human*  
455 *Environment*. 2008;37(4):280-285.

456 [9] Intergovernmental Panel on Climate Change (IPCC) 2013. *Climate Change 2013:*  
457 *The Physical Science Basis, Contribution of Working Group I to the Fifth Assessment*  
458 *Report of the Intergovernmental Panel on Climate Change*. In Stocker TF et al., editors.  
459 Cambridge, UK. Cambridge University Press; 2013.

460 [10] Benavides R, Escudero A, Coll L, Ferrandis P, Ogaya R, Gouriveau F, Peñuelas J,  
461 Valladares F. Recruitment patterns of four tree species along elevation gradients in  
462 Mediterranean mountains: Not only climate matters. *Forest Ecology and Management*.  
463 2016;360:287-296.

464 [11] Majer JD, Alonso LE, Schultz TR. 1st ed. Agosti D, Majer JD, Alonso LE,  
465 Schultz TR, editors. *Ants. Standard methods for measuring and monitoring biodiversity*.  
466 Washington D.C.: Smithsonian Institution Press; 2000.

467 [12] Cushman JH, Lawton JH, Manly BFJ. Latitudinal patterns in European ant  
468 assemblages: variation in species richness and body size. *Oecologia*. 1993;95:30-37.

469 [13] Azcárate FM, Arqueros L, Sánchez AM, Peco B. Seed and fruit selection by  
470 harvester ants, *Messor barbarus*, in Mediterranean grassland and scrubland. *Functional*  
471 *Ecology*. 2005;19:273-283.

- 472 [14] Wolff A, Debussche M. Ants as seed dispersers in a Mediterranean old-field  
473 succession. *Oikos*. 1999;84(3):443-452.
- 474 [15] Dean WRJ, Milton SJ, Klotz S. The role of ants nest-mounds in maintaining  
475 small-scale patchiness in dry grasslands in Central Germany. *Biodiversity and*  
476 *Conservation*. 1997;6:1293-1307.
- 477 [16] Philpott SM, Armbrrecht I. Biodiversity in tropical agroforest and the ecological  
478 role of ants and ant diversity in predatory function. *Ecological Entomology*.  
479 2006;31(4):369-377.
- 480 [17] Underwood EC, Fisher BL. The role of ants in conservation monitoring: If, when  
481 and how. *Biological Conservation*. 2006;132(2):166-182.
- 482 [18] Schmidt FA, Ribas CR, Schoereder JH. How predictable is the response of ant  
483 assemblages to natural forestry recovery? Implications for their use as bioindicators.  
484 *Ecological Indicators*. 2013;24:158-166.
- 485 [19] Machac A, Janda M, Dunn RR, Sanders NJ. Elevational gradients in phylogenetic  
486 structure of ant communities reveal the interplay of biotic and abiotic constraints on  
487 diversity. *Ecography*. 2011;34:364-371.
- 488 [20] Reymond A, Purcell J, Cherix D, Guisan A, Pellissier L. Functional diversity  
489 decreases with temperature in high elevation ant fauna. *Ecological*  
490 *entomology*. 2013;38(4):364-373.
- 491 [21] Kwon TS, Kim SS, Chun JH. Pattern of ant diversity in Korea: An empirical test  
492 of Rapoport's altitudinal rule. *Journal of Asia-Pacific Entomology*. 2014;17:161-167.



493 [22] Sanders NJ, Moss J, Wagner D. Patterns of ant species richness along elevational  
494 gradients in an arid ecosystem. *Global ecology and biogeography*. 2003;12(2):93-102.

495 [23] Orabi GM, Semida FM, Abdel-Dayem MS, Sharaf MR, Zalat SM. Diversity  
496 patterns of ants along an elevation gradient at St. Catherine Protectorate, South Sinai,  
497 Egypt: (Hymenoptera: Formicidae). *Zoology in the Middle East*. 2011;54(1):101-112.

498 [24] Longino JT, Colwell RK. Density compensation, species composition, and  
499 richness of ants on a neotropical elevational gradient. *Ecosphere*. 2011;2(3):1-20.

500 [25] Nowrouzi S, Andersen AN, Macfadyen S, Staunton KM, VanDerWal J, Robson  
501 SKA. Ant Diversity and Distribution along Elevation Gradients in the Australian Wet  
502 Tropics: The Importance of Seasonal Moisture Stability. *PLoS ONE*. 2016;11(4):  
503 e0153420. doi:10.1371/journal.pone.0153420

504 [26] Munyai TC, Foord SH. Ants on a mountain: spatial, environmental and habitat  
505 associations along an altitudinal transect in a centre of endemism. *Journal of Insect  
506 Conservation*. 2012;16:677-695.

507 [27] Munyai TC, Foord SH. Temporal Patterns of Ant Diversity across a Mountain  
508 with Climatically Contrasting Aspects in the Tropics of Africa. *PLoS ONE*. 2015;10(3):  
509 e0122035. doi:10.1371/journal.pone.0122035

510 [28] Sanders NJ, Rahbek C. The patterns and causes of elevational diversity  
511 gradients. *Ecography*. 2012;35(1):1-3.

512 [29] Szewczyk T, McCain CM. A Systematic Review of Global Drivers of Ant  
513 Elevational Diversity. *PLoS ONE*. 2016;11(5): e0155404.  
514 doi:10.1371/journal.pone.0155404

- 515 [30] Colwell RK, Lees DC. The mid-domain effect: geometric constraints on the  
516 geography of species richness. *Trends in Ecology & Evolution*. 2000;15(2):70-76.
- 517 [31] Sanders NJ. Elevational gradients in ant species richness: area, geometry, and  
518 Rapoport's rule. *Ecography*. 2002;25(1):25-32.
- 519 [32] Stevens GC. The elevational gradient in altitudinal range: an extension of  
520 Rapoport's latitudinal rule to altitude. *The American Naturalist*. 1992;140(6):893-911.
- 521 [33] Botes A, McGeoch MA, Robertson HG, van Niekerk A, Davids HP, Chown SL.  
522 Ants, altitude and change in the northern Cape Floristic Region. *Journal of*  
523 *Biogeography*. 2006;33:71-90.
- 524 [34] Smith MA, Hallwachs W, Janzen DH. Diversity and phylogenetic community  
525 structure of ants along a Costa Rican elevational gradient. *Ecography*. 2014;37(8):720-  
526 731.
- 527 [35] Brühl CA, Mohamed M, Linsenmair KE. Altitudinal distribution of leaf litter ants  
528 along a transect in primary forests on Mount Kinabalu, Sabah, Malaysia. *Journal of*  
529 *Tropical Ecology*. 1999;15:265-277.
- 530 [36] Kaspari M, O'Donnell S, Kercher JR. Energy, Density, and Constraints to Species  
531 Richness: Ant Assemblages along a Productivity Gradient. *The American Naturalist*.  
532 2000;155(2):280-293.
- 533 [37] Gotelli NJ, Ellison AM. Biogeography at a regional scale: determinants of ant  
534 species density in New England bogs and forests. *Ecology*. 2002;83(6):1604-1609.

535 [38] Lavergne S, Mouquet N, Thuiller W, Ronce O. Biodiversity and climate change:  
536 integrating evolutionary and ecological responses of species and communities. *Annual*  
537 *Review of Ecology, Evolution and Systematics*. 2010;41: 321-350.

538 [39] Laiolo P, Seoane J, Illera JC, Bastianelli G, Carrascal LM, Obeso JR. The  
539 evolutionary convergence of avian lifestyles and their constrained coevolution with  
540 species' ecological niche. *Proceedings of the Royal Society B: Biological Sciences*.  
541 2015;282(1821):20151808.

542 [40] Laiolo P, Seoane J, Obeso JR, Illera JC. Ecological divergence among young  
543 lineages favours sympatry, but convergence among old ones allows coexistence in  
544 syntopy. *Global Ecology and Biogeography*. 2017;26(5):601-608.

545 [41] Kodric-Brown A, Brown JH. Highly structured fish communities in Australian  
546 desert springs. *Ecology*. 1993;74:1847-1855.

547 [42] Baselga A. Partitioning the turnover and nestedness components of beta diversity.  
548 *Global Ecology and Biogeography*. 2010;19:134-143.

549 [43] Wright DH, Reeves JH. On the meaning and measurement of nestedness of  
550 species assemblages. *Oecologia*. 1992;92:416-428.

551 [44] Ulrich W, Gotelli NJ. Null model analysis of species nestedness patterns.  
552 *Ecology*. 2007;88(7):1824-1831.

553 [45] Gaston KJ, Davies RG, Orme CDL, Olson VA, Thomas GH, Ding TS,  
554 Rasmussen PC, Lennon JJ, Bennett PM, Owens IPF, Blackburn TM. Spatial turnover in  
555 the global avifauna. *Proceedings of the Royal Society B: Biological Sciences*.  
556 2007;274:1567-1574.

557 [46] Fielding CA, Whittaker JB, Butterfield JEL, Coulson JC. Predicting responses to  
558 climate change: the effect of altitude and latitude on the phenology of the Spittlebug  
559 *Neophilaenus lineatus*. *Functional Ecology*. 1999;13(1):65-73.

560 [47] Maguire KC, Nieto-Lugilde D, Fitzpatrick MC, Williams JW, Blois JL. Modeling  
561 species and community responses to past, present and future episodes of climatic and  
562 ecological change. *Annual Review of Ecology, Evolution and Systematics*.  
563 2015;46:343-368.

564 [48] Kleinwächter M, Rickfelder T. Habitat models for a riparian carabid beetle: their  
565 validity and applicability in the evaluation of river bank management. *Biodiversity and  
566 Conservation*. 2007;16(11):3067-3081.

567 [49] Duncan RP, Cassey P, Blackburn TM. Do climatic envelop models transfer? A  
568 manipulative test using dung beetle introductions. *Proceedings of the Royal Society B:  
569 Biological Sciences*. 2009;267:1449-1457.

570 [50] Torres LG, Sutton PJH, Thompson DR, Delord K, Weimerskirch H, Sagar PM, et  
571 al. Poor transferability of species distribution models for a pelagic predator, the grey  
572 petrel, indicates contrasting habitat preferences across ocean basins. *PLoS ONE*.  
573 2015;10(3): e0120014. doi:10.1371/journal.pone.0120014.

574 [51] i Casals MN, Pons X, i Nolla JMR. [Digital Climatic Atlas of the Iberian  
575 Peninsula. Methodology and applications in bioclimatology and geobotany] Bellaterra  
576 UAB; 2005. Spanish.

577 [52] Azcárate FM, Peco B. Abandonment of grazing in a mediterranean grassland area:  
578 consequences for ant assemblages. *Insect Conservation and Diversity*. 2012;5:279-288.

579 [53] Andersen AN. Sampling communities of ground-foraging ants: Pitfall catches  
580 compared with quadrat counts in an Australian tropical savanna. *Australian Journal of*  
581 *Ecology*. 1991;16:273-279.

582 [54] Azcárate FM, Seoane J, Castro S, Peco B. Drove roads: Keystone structures that  
583 promote ant diversity in Mediterranean forest landscapes. *Acta Oecologica*.  
584 2013;49:107-115.

585 [55] Hevia V, Azcárate FM, Oteros-Rozas E, González JA. Exploring the role of  
586 transhumance drove roads on the conservation of ant diversity in Mediterranean  
587 agroecosystems. *Biodiversity and Conservation*. 2013;22:2567-2581.

588 [56] Wang YI, Naumann U, Wright ST, Warton DI. mvabund—an R package for  
589 model-based analysis of multivariate abundance data. *Methods in Ecology and*  
590 *Evolution*. 2012;3(3):471-474.

591 [57] Rodríguez-Gironés MA, Santamaría L. A new algorithm to calculate the  
592 nestedness temperature of presence–absence matrices. *Journal of Biogeography*.  
593 2006;33(5):924-935.

594 [58] Almeida-Neto M, Guimarães P, Guimarães Jr PR, Loyola RD, Ulrich W. A  
595 consistent metric for nestedness analysis in ecological systems: reconciling concept and  
596 measurement. *Oikos*. 2008;117:1227-1239.

597 [59] Ulrich W, Almeida-Neto M, Gotelli NJ. A consumer's guide to nestedness  
598 analysis. *Oikos*. 2009;118(1):3-17.

599 [60] Ulrich W, Gotelli NJ. Pattern detection in null model analysis. *Oikos*.  
600 2013;122(1):2-18.

- 601 [61] Nolte D, Schuldt A, Gossner MM, Ulrich W, Assmann T. Functional traits drive  
602 ground beetle community structures in Central European forests: Implications for  
603 conservation. *Biological Conservation*. 2017;213:5-12.
- 604 [62] Moore JE, Swihart RK. Toward ecologically explicit null models of  
605 nestedness. *Oecologia*. 2007;152(4):763-777.
- 606 [63] Oksanen J, Blanchet FG, Friendly M, Kindt R, Legendre P, McGlinn D, et al.  
607 *Vegan: community ecology package R*. Version 24-3 [software]. 2017 [cited 21 July  
608 2018]. Available from: <https://github.com/vegandevs/vegan>.
- 609 [64] Baselga A, Orme CDL. *betapart: an R package for the study of beta*  
610 *diversity*. *Methods in Ecology and Evolution*. 2012;3(5):808-812.
- 611 [65] Joffre R, Rambal S, Ratte JP. The dehesa system of southern Spain and Portugal  
612 as a natural ecosystem mimic. *Agroforestry Systems*. 1999;45:57-79.
- 613 [66] Bergmeier E, Petermann J, Schröder E. Geobotanical survey of wood-pasture  
614 habitats in Europe: diversity, threats and conservation. *Biodiversity and Conservation*.  
615 2010;19:2995-3014.
- 616 [67] Sanders NJ, Lessard JP, Fitzpatrick MC, Dunn RR. Temperature, but not  
617 productivity or geometry, predicts elevational diversity gradients in ants across spatial  
618 grains. *Global Ecology and Biogeography*. 2007;16(5):640-649.
- 619 [68] Malsch AKF, Fiala B, Maschwitz U, Mohamed M, Nais J, Linsenmair KE. An  
620 analysis of declining ant species richness with increasing elevation at Mount Kinabalu,  
621 Sabah, Borneo. *Asian Myrmecology*. 2008;2:33-49.

- 622 [69] Jenkins CN, Sanders NJ, Andersen AN, Arnan X, Brühl CA, Cerda X, et al.  
623 Global diversity in light of climate change: the case of ants. *Diversity and Distributions*.  
624 2011;17:652-662.
- 625 [70] Azcárate FM, Kovacs E, Peco B. Microclimatic Conditions Regulate Surface  
626 Activity in Harvester Ants *Messor barbarus*. *Journal of Insect Behavior*.  
627 2007;20(3):315-329.
- 628 [71] Seoane J, Laiolo P, Obeso JR. Abundance leads to more species, particularly in  
629 complex habitats: a test of the increased population size hypotheses in bird  
630 communities. *Journal of Biogeography*. 2017;44:556-566.
- 631 [72] Storch D, Bohdalková E, Okie J. The more-individuals hypothesis revisited: the  
632 role of community abundance in species richness regulation and the productivity–  
633 diversity relationship. *Ecology Letters*. 2018;21:920-937.
- 634 [73] Flexas J, Diaz-Espejo A, Gago J, Gallé A, Galmés J, Gulías J, et al.  
635 Photosynthetic limitations in Mediterranean plants: A review. *Environmental and*  
636 *Experimental Botany*. 2014;103:12-23.
- 637 [74] Médail F, Quézel P. Biodiversity Hotspots in the Mediterranean Basin: Setting  
638 Global Conservation Priorities. *Conservation Biology*. 1999;13(6):1510-1513.
- 639 [75] Sfenthourakis S, Legakis A. Hotspots of endemic terrestrial invertebrates in  
640 southern Greece. *Biodiversity & Conservation*. 2001;10(8):1387-1417.
- 641 [76] Baselga A. Determinants of species richness, endemism and turnover in European  
642 longhorn beetles. *Ecography*. 2008;31:263–271.

643 [77] Evans KL, Warren PH, Gaston KJ. Species-energy relationships at the  
644 macroecological scale: a review of the mechanisms. *Biological Reviews*. 2005;80:1-25.

645 [78] Wilbur HM, Alford RA. Priority effects in experimental pond communities:  
646 responses of *Hyla* to *Bufo* and *Rana*. *Ecology*. 1985;66(4):1106-1114.

647 [79] Hanski I. Metapopulation dynamics. *Nature*. 1998;396:41-49.

648

### 649 **Supporting information**

650 **S1 Table. Species presence in each survey.**

651 **S2 Table. Nestedness indices for dry grassland ant assemblages in surveys from all**

652 **study areas in central Spain.** Guadarrama range (-G2014- year 2014: 18 grasslands,

653 35 species; -G2015- year 2015: 6 grasslands, 26 species) and Serrota range (-S2015-

654 year 2015: 6 grasslands, 20 species). Indices are Nestedness metric based on Overlap

655 and Decreasing Fill (NODF), NODFr for rows (i.e., localities) and NODFc for columns

656 (i.e., species) and matrix temperature (T). Numbers under headings for indices provide

657 index values followed by *P*-values estimated by equiprobable ('r00') binary null models

658 and proportional resampling ('quasiswap'). Significant *P*-values ( $P < 0.05$ ) are in bold

659 face. Fill: matrix fill (sum of 1s/sum of cells).

660 **S3 Fig. Temporal validation of the relationship between nestedness and elevation.**

661 Generalized additive model (GAM) of nestedness ranks (based on nestedness

662 temperature index) on elevation in ant assemblages from Guadarrama range (central

663 Spain) fit to Guadarrama 2014 data and validated with Guadarrama 2015 data.



664 **S4 Fig. Spatial validation of the relationship between nestedness and elevation.**

665 Generalized additive model (GAM) of nestedness ranks (based on nestedness  
666 temperature index) on elevation in ant assemblages from Guadarrama range (central  
667 Spain) fit to Guadarrama 2014 data and validated with Serrota 2015 data.

668 **S5 Table. Multiple-site dissimilarities of beta diversity.** Multiple-site dissimilarities

669 accounting for the spatial turnover ( $\beta_{SIM}$ ) and the nestedness components ( $\beta_{NES}$ ) of beta  
670 diversity, and sum of both values ( $\beta_{SOR}$ ) for dry grassland ant assemblages in all study  
671 areas in central Spain. G2014: Guadarrama range 2014; G2015: Guadarrama range  
672 2015; S2015: Serrota range 2015. *P*-values estimated by equiprobable binary null  
673 models ('r00') are given between parentheses. Significant *P*-values ( $P < 0.05$ ) are in  
674 bold face.

Species richness

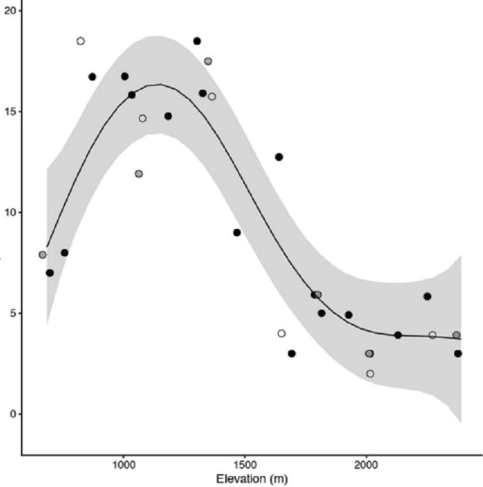

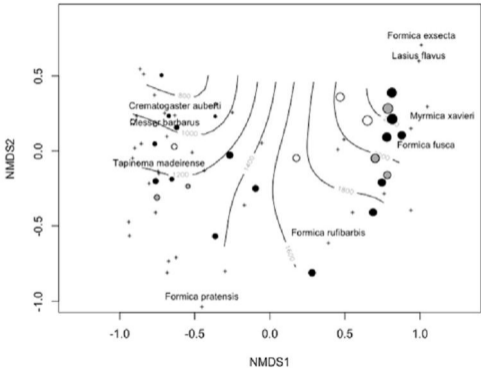

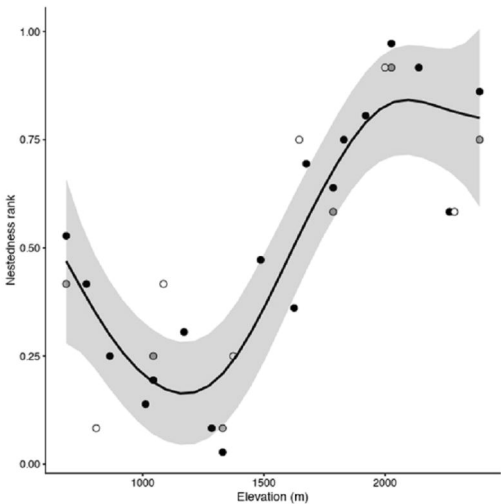

Source: https://www.biorxiv.org/content/biorxiv/early/2018/10/05/420059.full.pdf
